# Supplementary material for: The impact of extraction protocol on the chemical profile of cannabis extracts from a single cultivar
Source: Sci Rep. 2021 Nov 8;11:21801. doi: 10.1038/s41598-021-01378-0 (PMC8575894; doi:10.1038/s41598-021-01378-0)
Supplement: Supplementary file 2 — Supplementary Information 2. [file 41598_2021_1378_MOESM2_ESM.xlsx]

## Sheet: GC-MS
Supplementary data - Normalized peak areas for annotated metabolites identified by non-targeted GC-MS profiling. Annotations with numbers refer to structural isomers that could not be distinguished.
Metabolite	ETOH_rep1	ETOH_rep2	ETOH_rep3	ETOH_rep4	ETOH_rep5	IPA_rep1	IPA_rep2	IPA_rep3	IPA_rep4	IPA_rep5	S1_rep1	S1_rep2	S1_rep3	S1_rep4	S1_rep5	S2_rep1	S2_rep2	S2_rep3	S2_rep4	S2_rep5
Selinene_1	1.11849e+07	1.54403e+07	1.2923e+07	1.13675e+07	1.53033e+07	1.06934e+07	1.11844e+07	1.10056e+07	9.21916e+06	1.15671e+07	1.50923e+06	918865	1.60229e+06	1.95722e+06	1.12118e+06	2.01057e+06	1.78765e+06	1.45326e+06	1.85764e+06	1.47789e+06
Bisabolol	1.31443e+08	1.576e+08	1.61704e+08	1.58784e+08	128956097	1.80515e+08	1.75644e+08	1.76357e+08	1.72117e+08	1.73459e+08	3.47185e+07	2.5863e+07	2.7877e+07	3.34575e+07	3.57029e+07	1.04493e+08	9.37519e+07	8.08911e+07	9.54383e+07	8.39338e+07
Amyrin	1.43861e+07	1.56394e+07	1.53189e+07	1.41815e+07	1.41467e+07	1.68997e+07	1.82659e+07	1.6571e+07	1.58702e+07	1.74977e+07	2.11502e+07	2.11686e+07	2.03993e+07	2.26077e+07	2.2093e+07	2.88463e+07	2.74498e+07	2.35664e+07	2.75856e+07	2.63652e+07
Bisabolene	3.40401e+06	7.98501e+06	6.4943e+06	5.10883e+06	2.65525e+06	8.05568e+06	7.47242e+06	6.11362e+06	4.85851e+06	5.27958e+06	291915	321192	316927	318879	291389	893234	656785	477175	766030	406148
Eudesmol	5.12595e+07	7.41028e+07	6.94681e+07	6.4174e+07	4.88381e+07	9.64747e+07	8.44606e+07	8.073e+07	7.81411e+07	7.86463e+07	2.59543e+07	2.11401e+07	2.16538e+07	2.56501e+07	2.63513e+07	6.39922e+07	5.69893e+07	5.12251e+07	5.89964e+07	5.15891e+07
THC_1	7.37502e+07	1.12967e+08	1.00254e+08	8.49452e+07	6.05594e+07	1.26866e+08	123814833	1.10799e+08	1.12737e+08	1.29391e+08	1.40512e+07	1.18312e+07	1.34222e+07	1.52041e+07	1.55803e+07	4.22964e+07	3.8544e+07	3.13184e+07	3.91019e+07	3.29707e+07
THC_2	7.14366e+07	1.01698e+08	8.70571e+07	8.93813e+07	6.48244e+07	1.0251e+08	9.96855e+07	8.99048e+07	8.71388e+07	9.56481e+07	1.22473e+08	9.69386e+07	9.42678e+07	1.10028e+08	122168346	1.11206e+08	9.63388e+07	7.77873e+07	1.0413e+08	9.22395e+07
Monopalmitin	2.41665e+06	3.44378e+06	3.07633e+06	2.85744e+06	2.55528e+06	2.00725e+06	2.28646e+06	2.43773e+06	1.94201e+06	2.2423e+06	2.42753e+06	1.6289e+06	2.11212e+06	2523783	2.38327e+06	2.91634e+06	2.94597e+06	2.28539e+06	2.79193e+06	2.0738e+06
Eremophilene	3.17822e+07	4.95893e+07	4.53931e+07	4.12708e+07	3.29025e+07	5.45259e+07	5.56267e+07	5.28611e+07	4.84197e+07	5.12377e+07	7.57073e+06	5.65585e+06	6.07652e+06	7.58148e+06	7.49973e+06	1.9431e+07	1.82279e+07	1.60049e+07	1.76788e+07	1.53061e+07
Apigenin	50916.5	91738.6	72054.1	64532.7	61369.9	64702.5	73821	80921.4	55522.7	71297.7	74059.7	36586.1	45346.9	52604.9	54592.8	46255.2	62756.7	50972.3	49146.9	54880.8
Behenic acid	375571	498716	459637	396314	409388	391482	479123	479083	434608	463389	1.44741e+06	1.0584e+06	1.33449e+06	1.75805e+06	1.55452e+06	2.80932e+06	2.79932e+06	1.22643e+06	2.35295e+06	1.96487e+06
Boric acid	6.7908e+07	1.23472e+07	1.83782e+07	3.47777e+07	9.58662e+07	1.57752e+07	2.65071e+07	4.31938e+07	6.26434e+07	4.81549e+07	2.19416e+08	3.78491e+08	3.97672e+08	3.22167e+08	3.32727e+08	2.34068e+08	1.93085e+08	1.62773e+08	1.5052e+08	2.9631e+08
Campesterol	907274	974196	895751	790799	889749	851157	965207	1.02191e+06	896554	1.13489e+06	1.44709e+06	1.35455e+06	1.4642e+06	1.38594e+06	1.55359e+06	1.43409e+06	1.66557e+06	1.31059e+06	1.39119e+06	1.40342e+06
Cannabidiol_1	692166959	5.32756e+08	5.79537e+08	6.1636e+08	6.96784e+08	5.99037e+08	5.88868e+08	6.02752e+08	6.45647e+08	6.08387e+08	7.1323e+08	7.54282e+08	755262063	7.28777e+08	7.20173e+08	6.75096e+08	7.09155e+08	7.71698e+08	7.20906e+08	7.33624e+08
Cannabinol_2	2.38214e+07	3.59543e+07	3.34239e+07	3.28013e+07	2.5566e+07	4.47782e+07	4.34665e+07	4.21725e+07	3.54013e+07	4.16739e+07	3.94773e+07	3.15246e+07	3.09241e+07	3.88235e+07	3.93384e+07	2.94154e+07	2.60116e+07	2.30318e+07	2.82924e+07	2.55398e+07
Cannabinol_3	2.29584e+06	3.60957e+06	3.34864e+06	3.30934e+06	2.52156e+06	3.69564e+06	4.18102e+06	3.92838e+06	3.31535e+06	3.78923e+06	3.93683e+06	2.84847e+06	2.96362e+06	3.86096e+06	3.80813e+06	1.61134e+06	1.46022e+06	1.18664e+06	1.49118e+06	1.24644e+06
Caryophyllene	8.44897e+06	2.65529e+07	1.83535e+07	1.44935e+07	5.88641e+06	2.53124e+07	2.11256e+07	1.72504e+07	1.18823e+07	1.34341e+07	635955	505392	477186	627066	640855	2.72043e+06	2.29537e+06	1.87145e+06	2.64173e+06	1.779e+06
Caryophyllene oxide	7.76985e+06	1.23616e+07	1.12293e+07	1.07015e+07	7.21642e+06	1.25709e+07	1.2658e+07	1.15269e+07	9.63767e+06	1.00933e+07	1.13087e+06	890815	932793	1.01946e+06	1.14883e+06	3.39424e+06	2.92884e+06	2.4982e+06	3.23016e+06	2.80668e+06
Mannitol	1.09837e+07	3.43902e+07	2.92992e+07	1.93748e+07	1.24469e+07	6.01591e+06	5.40147e+06	4.90521e+06	3.5109e+06	3.68449e+06	415639	408279	418499	483741	461277	549407	576690	536903	581300	458988
Dodecanol	2.41963e+06	3.51933e+06	3.95245e+06	2.86666e+06	3.65702e+06	1.49907e+06	2.34134e+06	2.5257e+06	2.11457e+06	2.30659e+06	71495.6	62265.2	60657.6	81234.2	70425.3	140521	158591	132958	125799	84411.3
Pinitol_1	1.60082e+07	2.62433e+07	2.5445e+07	2.19089e+07	1.78172e+07	4.1178e+06	4.24318e+06	4.3631e+06	3.46951e+06	3.69489e+06	591292	490002	494892	582907	580696	614197	595612	578797	591323	508739
Eicosanol	1.16048e+06	1.5762e+06	1.52506e+06	1.41186e+06	1.27351e+06	1.50484e+06	1.65886e+06	1.50343e+06	1.38883e+06	1.63313e+06	1.43393e+06	1.33669e+06	1.46692e+06	1.51917e+06	1.64721e+06	4.75423e+06	4.32137e+06	3.75372e+06	4.48213e+06	3.74954e+06
Eicosanoic acid	3.73563e+06	4.66628e+06	4.39263e+06	4.3719e+06	3.56461e+06	4.98256e+06	4.84403e+06	4.62897e+06	4.53633e+06	4.82508e+06	6.21307e+06	4.76856e+06	5.05848e+06	6.43942e+06	6.4235e+06	1.05277e+07	9.58087e+06	6.84728e+06	9.54168e+06	8.21681e+06
Ethanolamine	5.72463e+08	3.37541e+08	4.13835e+08	4.37674e+08	5.76871e+08	3.85616e+08	3.94013e+08	4.3754e+08	4.79929e+08	4.34092e+08	6.14793e+08	7.16998e+08	700118423	6.35731e+08	5.8661e+08	4.69726e+08	564605773	6.40496e+08	5.2838e+08	5.88221e+08
Glycerol	2.28425e+07	3.45214e+07	3.34034e+07	2.76497e+07	2.48273e+07	6.9065e+06	7.09164e+06	7.61623e+06	6.65569e+06	6.56722e+06	2.08319e+06	1.98174e+06	2.14525e+06	2.4119e+06	2.03434e+06	5.85394e+06	2.97696e+06	3.09601e+06	2.92358e+06	2284276
Glycerol monostearate	4.63487e+06	5.10176e+06	4.43653e+06	4.96396e+06	6.24386e+06	3.24795e+06	3.58429e+06	5.45361e+06	3.70499e+06	4.90768e+06	5.35532e+06	4.27991e+06	6.06759e+06	6.23621e+06	5.25848e+06	4.91262e+06	6.92733e+06	5.24421e+06	6.04233e+06	3.94259e+06
Palmitoleic acid	2.06246e+06	3.06822e+06	3.37775e+06	2.73402e+06	2.13119e+06	2.29086e+06	2.63044e+06	2.65805e+06	2.02025e+06	2.42544e+06	668056	515507	582306	752730	676020	2.92494e+06	2.74511e+06	2.33006e+06	2.68577e+06	2.13812e+06
Humulene	6.67541e+06	1.76637e+07	1.35196e+07	1.08014e+07	5.00532e+06	1.74051e+07	1.51483e+07	1.25694e+07	9.35654e+06	1.0271e+07	681677	556980	572813	691299	664180	2.52008e+06	2.14689e+06	1.8453e+06	2.44737e+06	1.76779e+06
myo-Inositol	9.58367e+06	1.57808e+07	1.45857e+07	1.2966e+07	1.05993e+07	3.39513e+06	3.4209e+06	3.32679e+06	2.85655e+06	3.16311e+06	901769	771009	775012	901723	913527	1.37252e+06	1.26156e+06	1.10571e+06	1.27638e+06	1.13585e+06
Linoleic acid	4.63517e+06	7.13483e+06	6.65881e+06	6.3889e+06	5.13181e+06	5.27279e+06	5.76003e+06	5.7631e+06	4.931e+06	5.209e+06	5.09819e+06	3.22729e+06	3.70163e+06	5.30968e+06	4.71911e+06	8.68904e+06	7.69101e+06	6.46148e+06	7.6163e+06	6.26243e+06
Pinitol_2	3.51712e+06	5.54863e+06	5.36886e+06	4.77328e+06	4.40294e+06	993528	1.04339e+06	1.01541e+06	732776	941268	203121	190435	202389	228928	223220	210175	241144	227598	216374	198858
Palmitic Acid	7.34676e+06	7.4473e+06	7.69707e+06	7.0426e+06	8.07669e+06	4.23562e+06	5.20451e+06	5.49306e+06	4.94003e+06	5.43273e+06	2.01828e+07	1.46115e+07	1.66938e+07	2.12332e+07	1.98929e+07	6.91413e+07	6.24034e+07	5.15158e+07	6.19507e+07	5.24271e+07
Phytol	2.77231e+07	4.51399e+07	4.0472e+07	3.54746e+07	3.08394e+07	3.97011e+07	4.42915e+07	4.15065e+07	3.70879e+07	3.99075e+07	1.72361e+07	1.33615e+07	1.45799e+07	1.93757e+07	1.90678e+07	5.42441e+07	4.98092e+07	4.10967e+07	4.96693e+07	4.10203e+07
Selinene_2	4.32855e+06	7.86913e+06	7.12883e+06	5.73867e+06	2.94648e+06	1.01203e+07	8.34138e+06	6.67285e+06	6.14019e+06	6.17531e+06	580304	321778	353383	558811	529069	2.84787e+06	2.41164e+06	1.92904e+06	2.66666e+06	2.01135e+06
Sitosterol	2.69297e+06	2.71333e+06	2.42295e+06	2.18035e+06	2.44077e+06	2.52254e+06	2.72962e+06	2.89187e+06	2.47264e+06	3.23597e+06	4.41763e+06	4.2755e+06	4.67609e+06	4.13702e+06	4.86527e+06	4.19876e+06	4.85146e+06	3.82544e+06	4.1295e+06	4.29005e+06
Stearic acid	1.50929e+06	1.21237e+06	1.23287e+06	1.16482e+06	1.21961e+06	834627	922890	1.00159e+06	1.07095e+06	1.05238e+06	5.17859e+06	4.0493e+06	4.49137e+06	5.53022e+06	5.2484e+06	1.24134e+07	1.16279e+07	9.3158e+06	1.13682e+07	9.70279e+06
Sucrose	6.3502e+07	1.00068e+08	9.49038e+07	8.37904e+07	6.99232e+07	1.43055e+07	1.40026e+07	1.36057e+07	1.13184e+07	1.34228e+07	1.92376e+06	1.62495e+06	1.85064e+06	1.74285e+06	1.76872e+06	1.24484e+06	1.31037e+06	1.2876e+06	1.32265e+06	1.26106e+06
Tocopherol	4.51582e+06	4.70937e+06	4.93409e+06	4.53935e+06	4.2072e+06	4.12738e+06	4.7473e+06	4.37317e+06	4.25544e+06	4.58633e+06	1.63867e+07	1.35367e+07	1.42877e+07	1.70283e+07	1.67271e+07	1.50325e+07	1.42476e+07	1.14177e+07	1.38569e+07	1.21552e+07
Trehalose	6.63119e+06	1.03367e+07	9.54013e+06	8.47723e+06	7.23048e+06	1.83154e+06	2.05481e+06	1.88282e+06	2.34303e+06	1.89771e+06	319854	312336	347387	323409	342140	244372	301800	296462	269926	277732
Xylitol	4.22364e+06	1.23524e+07	1.11149e+07	7.61518e+06	4.76782e+06	2.48419e+06	2.40174e+06	2.09418e+06	1.49986e+06	1.66951e+06	167595	156296	159218	176943	166442	228498	232058	242081	217417	209558

## Sheet: LC-MS
Supplementary data - Normalized peak areas for phytocannabinoids detected by UPLC-MS/MS.
Phytocannabinoid	ETOH_rep1	ETOH_rep2	ETOH_rep3	ETOH_rep4	ETOH_rep5	IPA_rep1	IPA_rep2	IPA_rep3	IPA_rep4	IPA_rep5	S1_rep1	S1_rep2	S1_rep3	S1_rep4	S1_rep5	S2_rep1	S2_rep2	S2_rep3	S2_rep4	S2_rep5
CBD	757.497	1069.01	1042.1	717.676	1299.55	1232.12	1325.36	1300.28	1208.4	1014.98	559.957	651.048	745.108	482.65	601.659	640.882	991.713	782.957	786.469	821.624
CBDA	0.0493333	0.09	0.0793333	0.0426667	0.0946667	0.062	0.0733333	0.0573333	0.0493333	0.036	3.84267	5.392	5.67667	3.24467	4.506	0.533333	1.01733	0.700667	0.728	0.748
CBDV	2.678	4.1	3.89933	2.47467	5.49467	4.28467	5.44	5.338	4.85	3.87733	1.55333	1.83467	2.00067	1.34333	1.73533	2.06067	3.41133	2.866	2.53267	2.79067
CBG	18.7033	28.2313	26.3793	17.202	23.8547	33.0747	27.9167	22.102	22.6053	20.0847	16.4673	21.2307	23.3353	10.682	13.2813	12.16	15.7233	9.68133	10.6567	10.2433
CBC	52.35	75.312	71.27	46.5333	71.9353	79.968	79.6273	67.538	62.7947	54.392	45.6887	41.9907	59.81	27.782	37.7127	44.75	67.51	41.2187	43.2867	41.9627
CBCV	0.127333	0.400667	0.308667	0.253333	0.344667	0.556667	0.324	0.36	0.342667	0.281333	0.252	0.234	0.243333	0.121333	0.128667	0.267333	0.269333	0.221333	0.135333	0.175333
CBGA	0.0753333	0.0606667	0.0873333	0.0573333	0.064	0.113333	0.09	0.0473333	0.066	0.0533333	0.136667	0.128	0.127333	0.0433333	0.068	0.058	0.0586667	0.0453333	0.046	0.046
CBL	2.30067	3.22733	3.336	1.98533	4.746	3.842	4.712	4.43	4.01933	3.21133	1.804	1.98133	2.192	1.386	2.01067	1.75933	3.00867	2.32667	2.54933	2.408
CBN	1.634	2.86	2.674	1.71533	3.36333	3.386	4.11467	3.864	3.174	2.522	1.992	2.53867	2.76733	1.54333	2.07	1.30533	2.27133	1.65333	1.57133	1.67667
CBNA	0.0166667	0.0133333	0.0153333	0.0126667	0.0146667	0.0186667	0.0146667	0.012	0.0126667	0.014	0.018	0.018	0.018	0.014	0.014	0.0166667	0.016	0.012	0.012	0.014
CBT	8.33333	11.966	11.182	6.76667	16.7913	15.35	16.8527	17.944	15.604	13.4767	1.518	1.59667	2.18533	1.43333	1.77	2.79133	5.04067	3.882	3.87533	4.022
delta9-THC	36.2513	54.5547	54.9567	33.6127	78.2833	59.3747	70.988	74.2307	65.6413	52.1693	40.3073	42.79	52.7953	32.8633	45.968	29.4987	54.6713	41.3893	40.5307	43.2667
THCVA	0.034	0.034	0.0333333	0.0286667	0.026	0.036	0.028	0.0306667	0.0306667	0.032	0.038	0.044	0.0353333	0.03	0.0386667	0.036	0.036	0.0373333	0.04	0.0413333
THCV	0.167333	0.204667	0.199333	0.134667	0.218667	0.196667	0.202	0.168667	0.194	0.174	0.146	0.14	0.205333	0.12	0.128	0.122	0.15	0.116667	0.132	0.122667
CBCO	0.241333	0.380667	0.454667	0.341333	0.470667	0.288	0.368667	0.369333	0.334	0.343333	0.205333	0.177333	0.276	0.150667	0.126	0.162667	0.286667	0.272667	0.351333	0.339333

## Sheet: ICP-MS
Supplementary data - Elemetal concentrations (mg/g) for each extraction. Measured calculations below the LOQ were assigned to LOQ/2
Element	LOD	LOQ	ETOH_rep1	ETOH_rep2	ETOH_rep3	ETOH_rep4	ETOH_rep5	IPA_rep1	IPA_rep2	IPA_rep3	IPA_rep4	IPA_rep5	S1_rep1	S1_rep2	S1_rep3	S1_rep4	S1_rep5	S2_rep1	S2_rep2	S2_rep3	S2_rep4	S2_rep5
Al	77	250	11000	7810	8800	1960	2450	3350	8200	5370	3540	8640	6250	9350	3220	5440	8690	1830	10500	8480	5830	12500
As	1.4	4.6	2.3	4.94	4.86	2.3	2.3	2.3	2.3	2.3	2.3	2.3	2.3	2.3	2.3	2.3	2.3	2.3	2.3	2.3	2.3	2.3
B	48	160	767	1890	1090	1110	1100	1340	1510	1310	1220	1030	257	250	271	534	641	80	226	246	80	195
Ba	4.2	14	258	277	312	135	140	170	308	185	195	305	205	343	188	162	281	104	404	263	216	343
Ca	120	370	68000	120000	121000	70600	45800	94800	150000	104000	90000	130000	20500	85600	9630	19600	52800	4660	80500	43600	17600	86400
Cd	0.12	0.38	2.38	1.9	1.4	0.948	1.07	1.4	1.17	1.4	1.47	1.72	0.19	3	0.19	0.19	1.15	0.19	0.19	0.923	0.19	0.722
Co	11	36	112	178	200	117	72.5	147	234	160	134	198	39.9	128	18	54.9	91	5.5	122	68.5	38.9	144
Cr	0.28	0.92	1.68	1.3	0.938	0.97	5.7	1.58	4.79	1.68	6.15	2.49	0.46	1.97	5.14	3.21	3.2	4.07	1.16	61.1	1.79	13.5
Cu	0.043	0.14	319	335	320	301	2180	782	299	329	3990	310	308	297	296	336	354	536	296	3680	561	1060
Fe	280	920	6180	5640	8480	3880	4600	13600	10900	4920	9890	12800	460	5430	460	3910	8470	460	5350	6880	5880	95200
K	840	2800	438000	1450000	803000	964000	440000	352000	345000	348000	319000	296000	67000	58800	57200	59500	66300	58800	58200	71400	55400	66200
Li	12	37	18.5	52.8	18.5	41.2	18.5	18.5	18.5	18.5	18.5	18.5	18.5	18.5	18.5	18.5	18.5	18.5	18.5	18.5	18.5	18.5
Mg	190	620	161000	261000	224000	217000	152000	168000	165000	168000	154000	140000	59300	61900	58900	59200	60900	58300	61600	62100	59100	63000
Mn	7.5	25	3670	9270	5660	5510	3710	6470	6560	6830	5820	5060	191	353	105	144	300	31.8	336	220	121	782
Mo	0.17	0.55	5.21	7.42	6.87	7.1	5.2	12.4	14.6	16.2	11.5	15.4	6.95	4.97	13.4	5.5	6.34	0.703	1.24	1.31	2.94	3.1
Na	23	77	6020	16200	15700	8190	7440	6190	7490	6610	5830	6240	3080	3940	2970	4410	4970	2890	5750	5920	3820	5800
Ni	0.042	0.14	11.4	19	16.2	9.24	27.3	12.9	17.3	14.3	86.3	19.1	2.77	10.1	1.26	4.32	13.6	4.91	11.4	6.67	23.4	53.1
P	17000	56000	325000	548000	430000	447000	322000	262000	248000	264000	229000	220000	106000	89400	117000	100000	106000	83900	89000	84300	99900	79600
Pb	0.011	0.036	0.287	0.697	0.256	0.0055	27.9	5.67	0.263	0.869	41	0.291	0.018	0.018	0.018	0.0953	0.703	1.44	0.018	51.2	0.945	4.84
S	3200	10000	19100	19700	18400	19700	18800	18800	18500	18700	18100	19000	17700	17600	17400	17800	18000	18600	17800	17700	18000	17900
Sr	0.4	1.3	266	623	410	367	244	683	712	725	661	619	0.65	51.4	0..65	0.65	24	0.65	50.8	18.3	0.65	92.4
V	1.4	4.4	7.25	9.11	7.03	6.11	6.82	9.54	12.4	10	8.95	11	5.53	4.65	2.2	5.73	4.65	4.8	6.29	4.65	4.72	11.3
W	150	500	250	250	250	250	926	250	250	250	250	2930	250	250	4220	250	250	250	592	250	250	250
Zn	55	180	1680	1500	1550	898	9390	3440	2080	1680	18600	1810	675	1770	319	717	1340	1270	1210	23200	1690	5100
